# Supplementary material for: Inhalation delivery of dexamethasone with iSEND nanoparticles attenuates the COVID-19 cytokine storm in mice and nonhuman primates
Source: PubMed Central journal article supplement (PMC10266725; doi:10.1126/sciadv.adg3277), 2023-06-14
Supplement: sciadv.adg3277_sm.pdf [file sciadv.adg3277_sm.pdf]

Supplementary Materials for

**Inhalation delivery of dexamethasone with iSEND nanoparticles attenuates the COVID-19 cytokine storm in mice and nonhuman primates**

Qian-Fang Meng *et al.*

Corresponding author: Xiao Li, [skylee6226@163.com](mailto:skylee6226@163.com); Gong Cheng, [gongcheng@mail.tsinghua.edu.cn](mailto:gongcheng@mail.tsinghua.edu.cn);  
Xiaoyuan Chen, [chen.shawn@nus.edu.sg](mailto:chen.shawn@nus.edu.sg); Lang Rao, [lrao@szbl.ac.cn](mailto:lrao@szbl.ac.cn)

*Sci. Adv.* **9**, eadg3277 (2023)  
DOI: 10.1126/sciadv.adg3277

**This PDF file includes:**

Figs. S1 to S33  
Tables S1 to S5

## Supplementary Figures and Tables

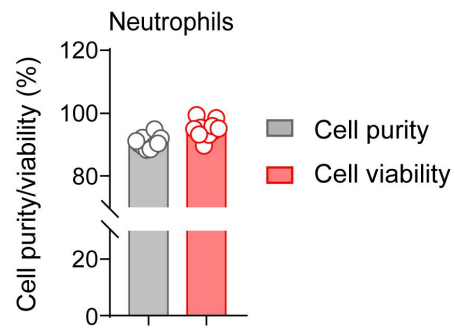

**Supplementary Figure 1.** Purity and viability of isolated neutrophils. All data are presented as mean  $\pm$  S.D. ( $n = 10$ ).

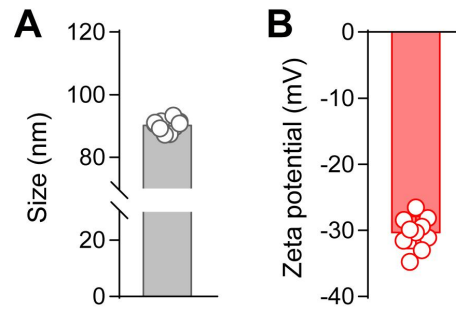

**Supplementary Figure 2.** (A) Size and (B) zeta potential of N-NVs in PBS. All data are presented as mean  $\pm$  S.D. ( $n = 10$ ).

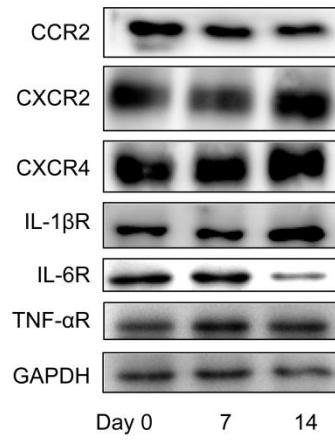

**Supplementary Figure 3.** Protein stability of N-NVs in PBS over 14 days.

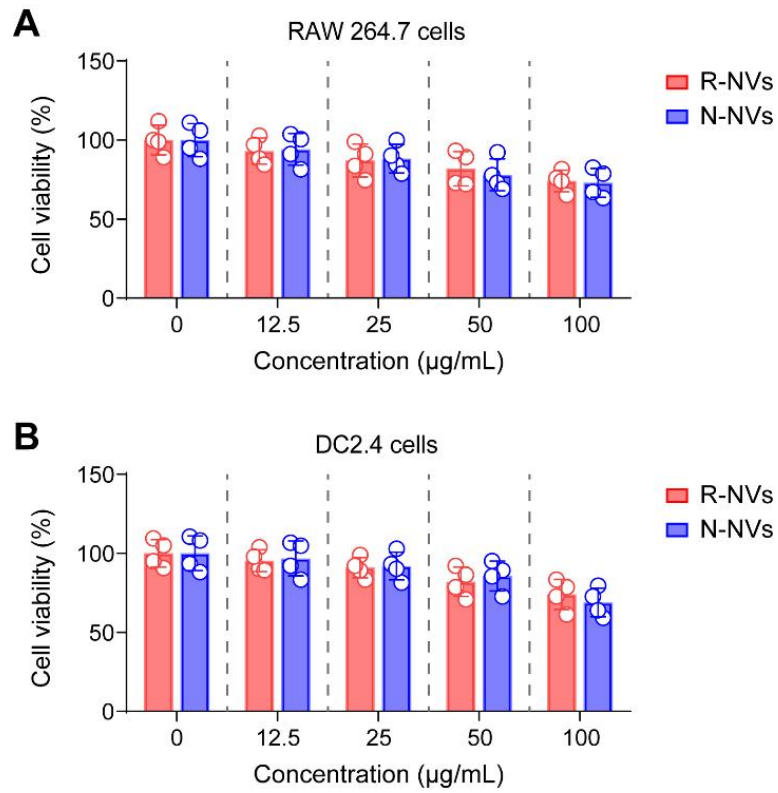

**Supplementary Figure 4.** (A) RAW 264.7 and (B) DC2.4 cell viability after incubation with indicated concentrations of R-NVs or N-NVs. All data are presented as mean  $\pm$  S.D. ( $n = 4$ ).

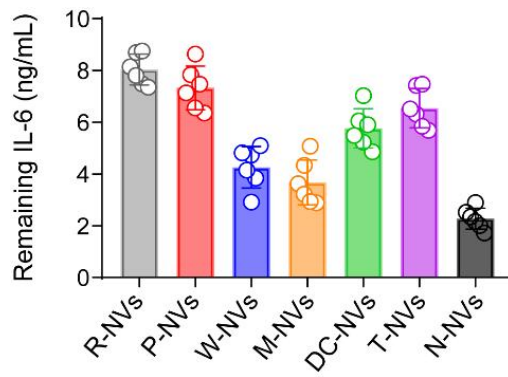

**Supplementary Figure 5.** Head-to-head comparison of the IL-6 binding capacity between different NVs derived from red blood cells (RBCs), platelets (PLTs), white blood cells (WBCs), macrophages, dendritic cells (DCs), T cells, and neutrophils. All data are presented as mean  $\pm$  S.D. ( $n = 6$ ).

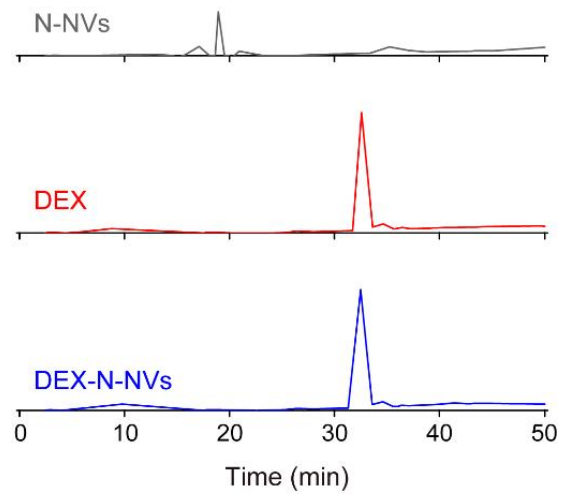

**Supplementary Figure 6.** HPLC analysis of N-NVs, DEX, and DEX-N-NVs. AU, arbitrary units.

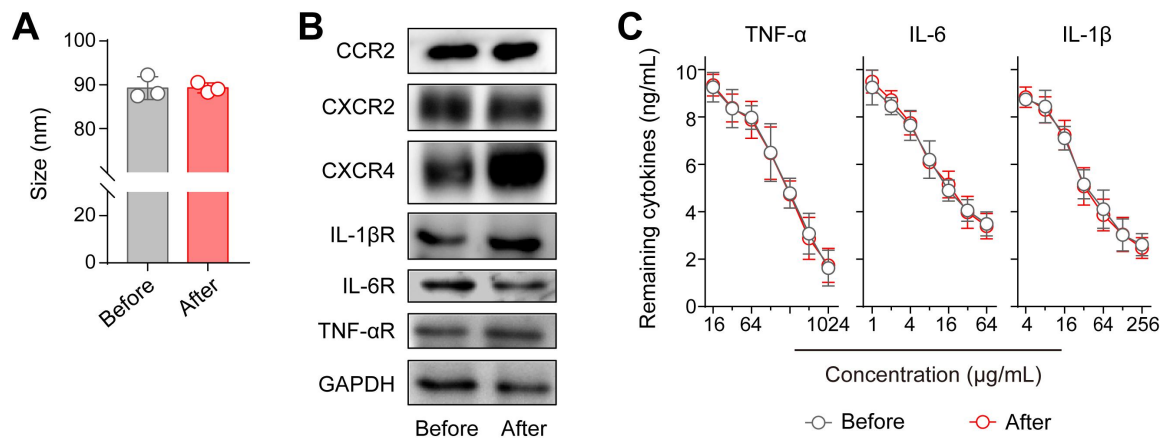

**Supplementary Figure 7.** Physicochemical properties of N-NVs before and after the sonication loading of DEX. (A) Size distribution of N-NVs before and after sonication. (B) Western blotting analysis of chemokine and cytokine receptors in N-NVs before and after sonication. (C) Binding capacity analysis of N-NVs with TNF- $\alpha$ , IL-6 and IL-1 $\beta$  before and after sonication. All data are presented as mean  $\pm$  S.D. ( $n = 3$ ).



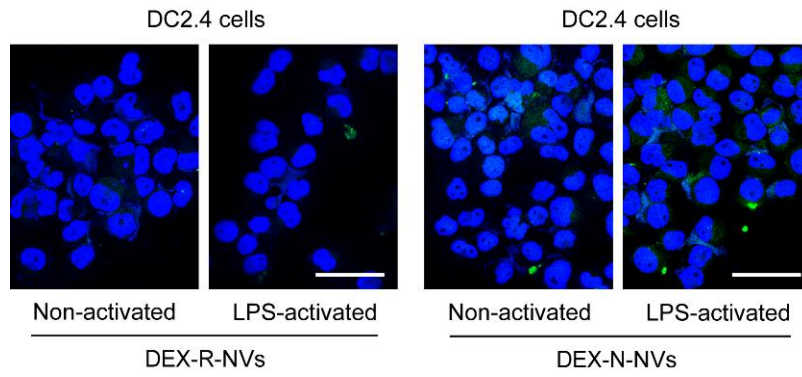

**Supplementary Figure 8.** Fluorescent images of non-activated or LPS-activated DC2.4 cells after incubation with DEX-R-NVs or DEX-N-NVs. Scale bar, 100  $\mu\text{m}$ . DEX-R-NVs and DEX-N-NVs were labelled with DiO (green) before the incubation.

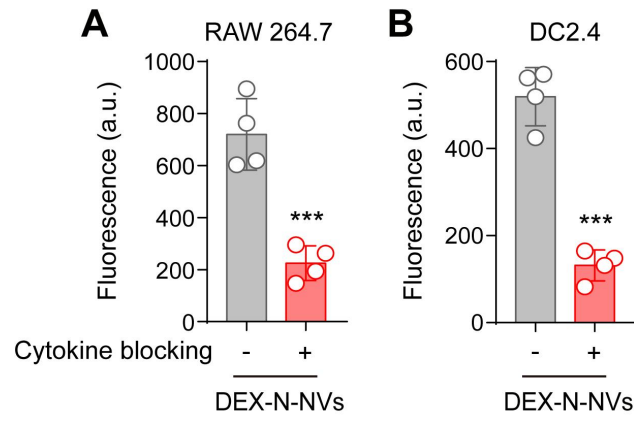

**Supplementary Figure 9.** Fluorescence intensity analysis of DiO (green) in (A) RAW 264.7 and (B) DC2.4 cells after incubation with DEX-N-NVs with or without cytokine blocking treatment. All data are presented as mean  $\pm$  S.D. ( $n = 4$ ).

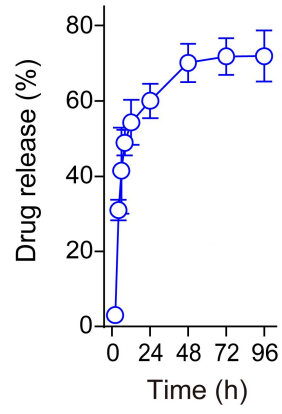

**Supplementary Figure 10.** Drug release profile of DEX-N-NVs after i.h. delivery. All data are presented as mean  $\pm$  S.D. ( $n = 3$ ).

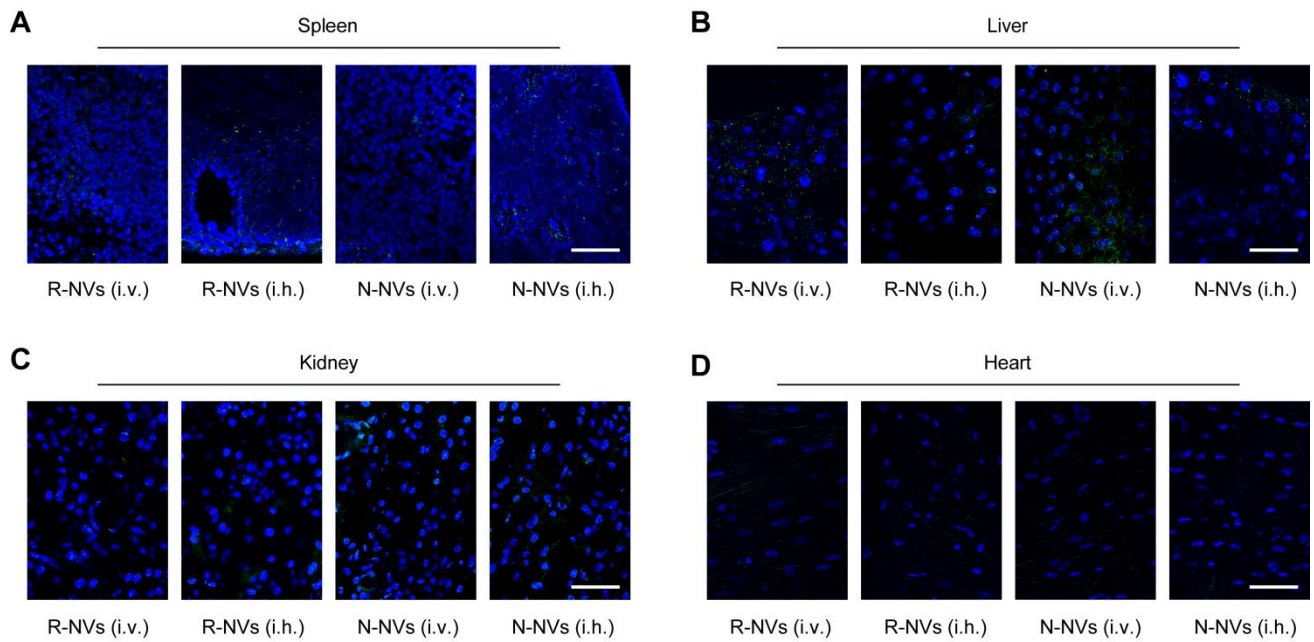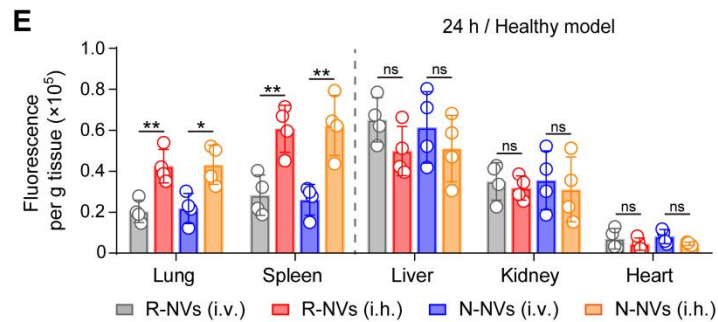

**Supplementary Figure 11.** Fluorescent images showing the accumulation of R-NVs or N-NVs in (A) spleen, (B) liver, (C) kidney and (D) heart after i.v. or i.h. delivery. Scale bars, 50  $\mu\text{m}$ . R-NVs and N-NVs are labelled with DiO (green fluorescence) before the delivery. (E) Biodistribution of R-NVs or N-NVs in major organs at 24 h after i.v. or i.h. delivery in healthy mice. All data are presented as mean  $\pm$  S.D. ( $n = 4$ ). Statistical significance was calculated *via* ordinary one-way ANOVA with Tukey's test. \* $P < 0.05$ ; \*\* $P < 0.01$ .

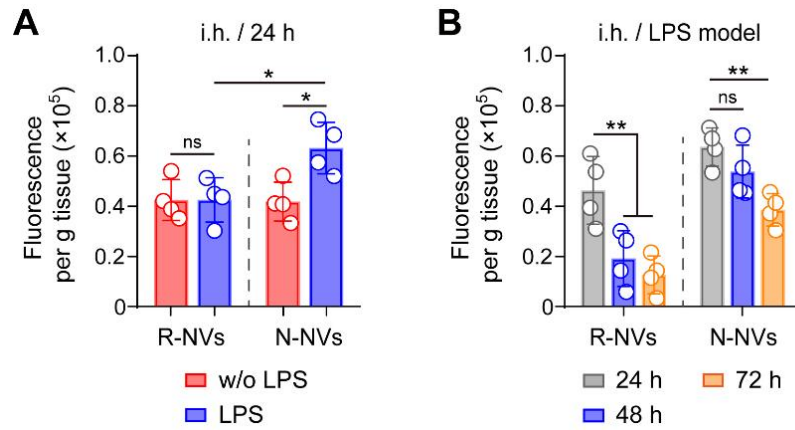

**Supplementary Figure 12.** (A) Lung accumulation of R-NVs or N-NVs at 24 h after i.h. delivery in healthy or LPS-infected mice. (B) Lung accumulation of R-NVs or N-NVs at different time points after i.h. delivery in LPS-infected mice. All data are presented as mean  $\pm$  S.D. ( $n = 4$ ).

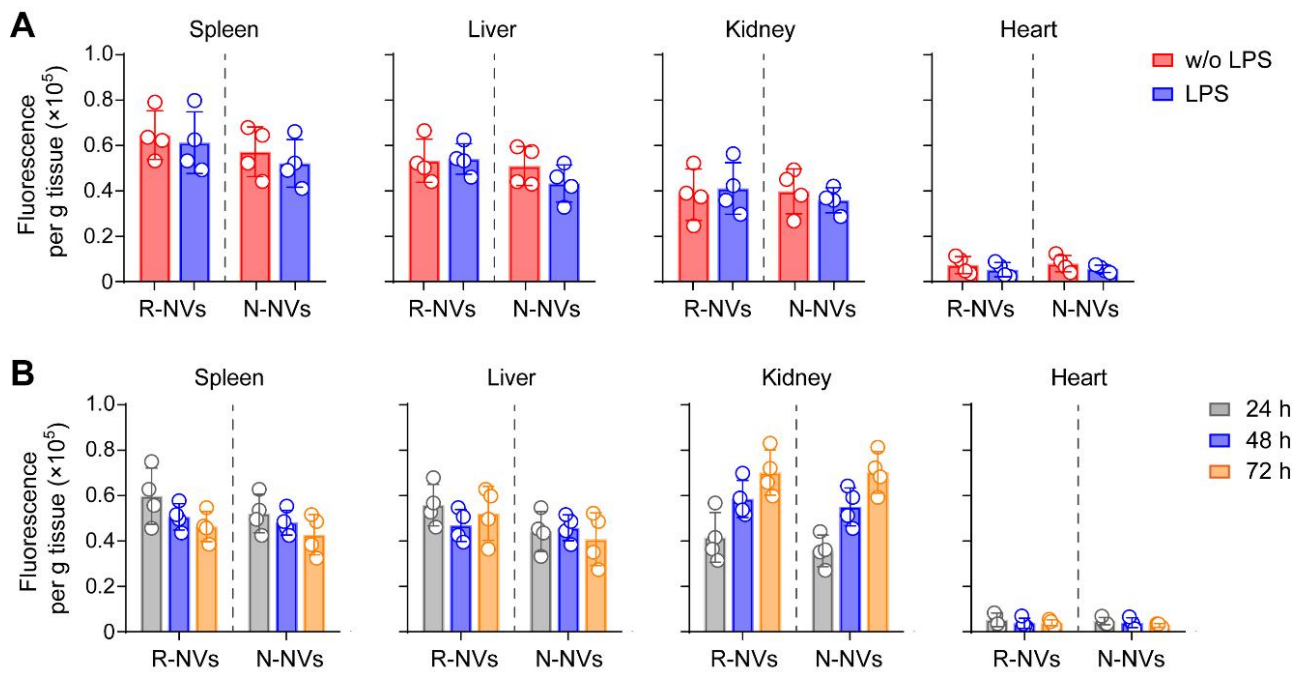

**Supplementary Figure 13.** (A) *In vivo* biodistribution of R-NVs or N-NVs in major organs at 24 h after i.v. or i.h. delivery in healthy or LPS-infected mice. (B) *In vivo* biodistribution of R-NVs or N-NVs in major organs at different time points after i.h. delivery in LPS-infected mice. All data are presented as mean  $\pm$  S.D. ( $n = 4$ ).

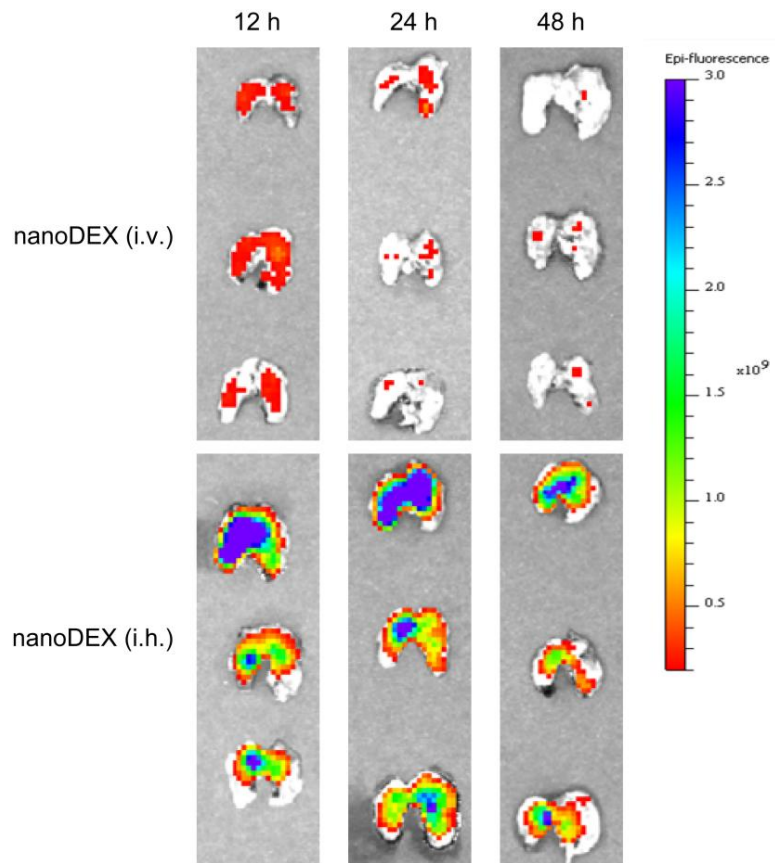

**Supplementary Figure 14.** Accumulation of nanoDEX in inflamed lungs at 12, 24, and 48 h after i.v. or i.h. delivery in LPS-infected mice. ( $n = 3$ ).

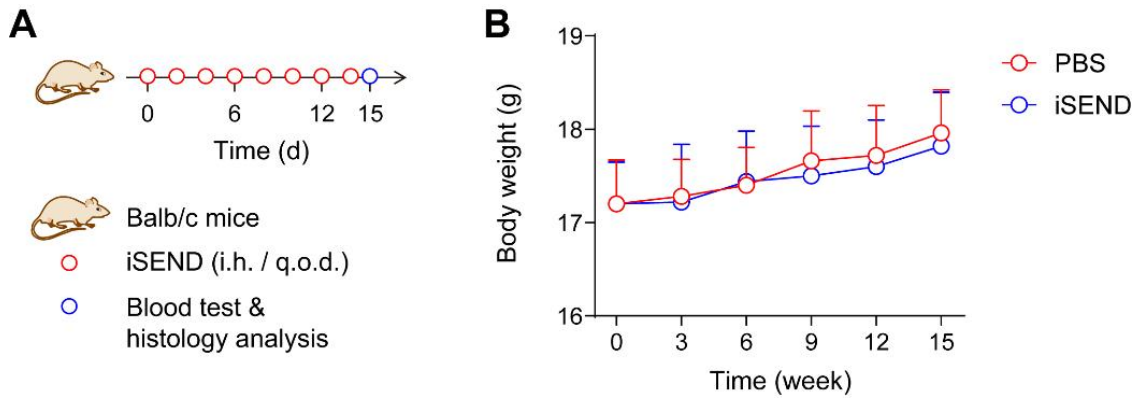

**Supplementary Figure 15.** *In vivo* toxicity of iSEND. (A) Schematic showing the treatment schedule. The mice received repeated i.h. delivery of PBS or PBS containing iSEND q.o.d. and blood samples and major organs were collected from mice 15 days after treatment for blood biochemistry, complete blood, and histology analysis. (B) Mice body weight change curves. All data are presented as mean  $\pm$  S.D. ( $n = 5$ ).



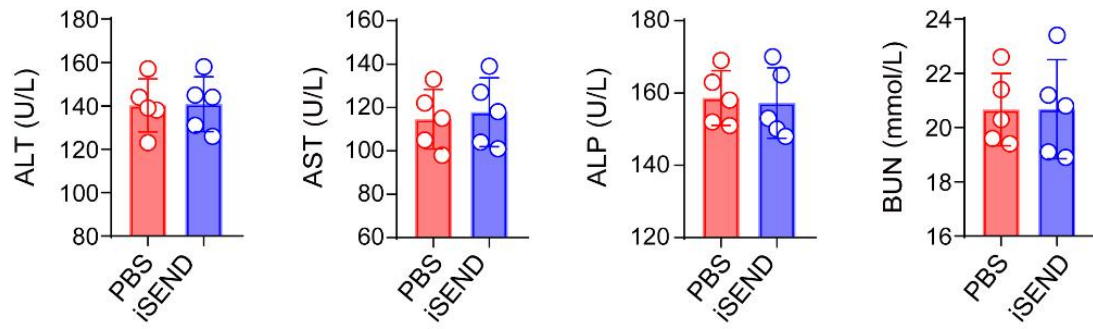

**Supplementary Figure 16.** Blood biochemistry analysis. ALT: alanine transaminase; AST: aspartate aminotransferase; ALP: alkaline phosphatase; BUN: blood urea nitrogen. All data are presented as mean  $\pm$  S.D. ( $n = 5$ ).

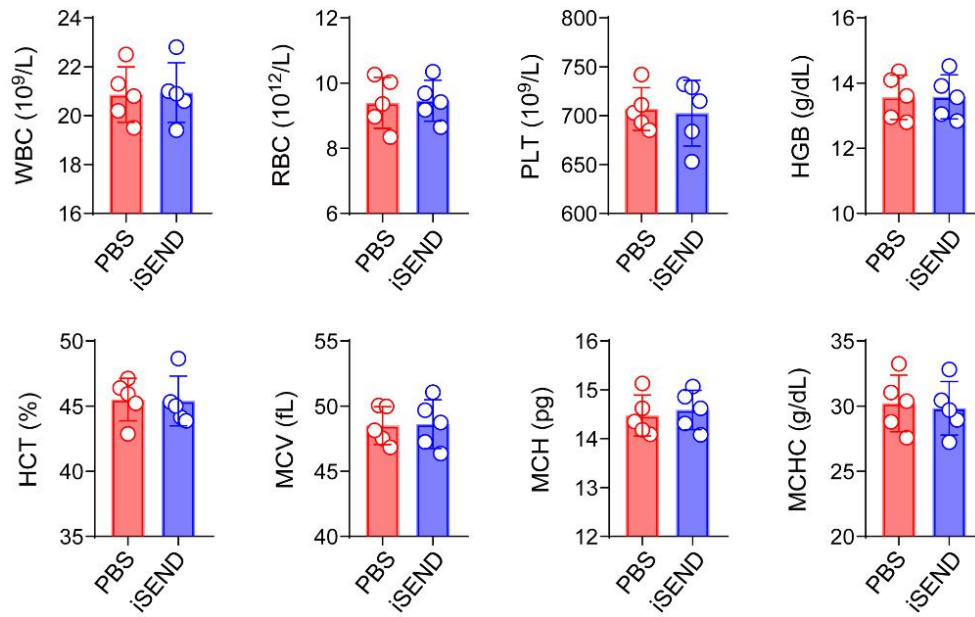

**Supplementary Figure 17.** Complete blood panel analysis. WBC: white blood cell; RBC: red blood cell; PLT: platelet; HGB: hemoglobin; HCT: hematocrit; MCV: mean corpuscular volume; MCH: mean corpuscular hemoglobin; MCHC: mean corpuscular hemoglobin concentration. All data are presented as mean  $\pm$  S.D. ( $n = 5$ ).

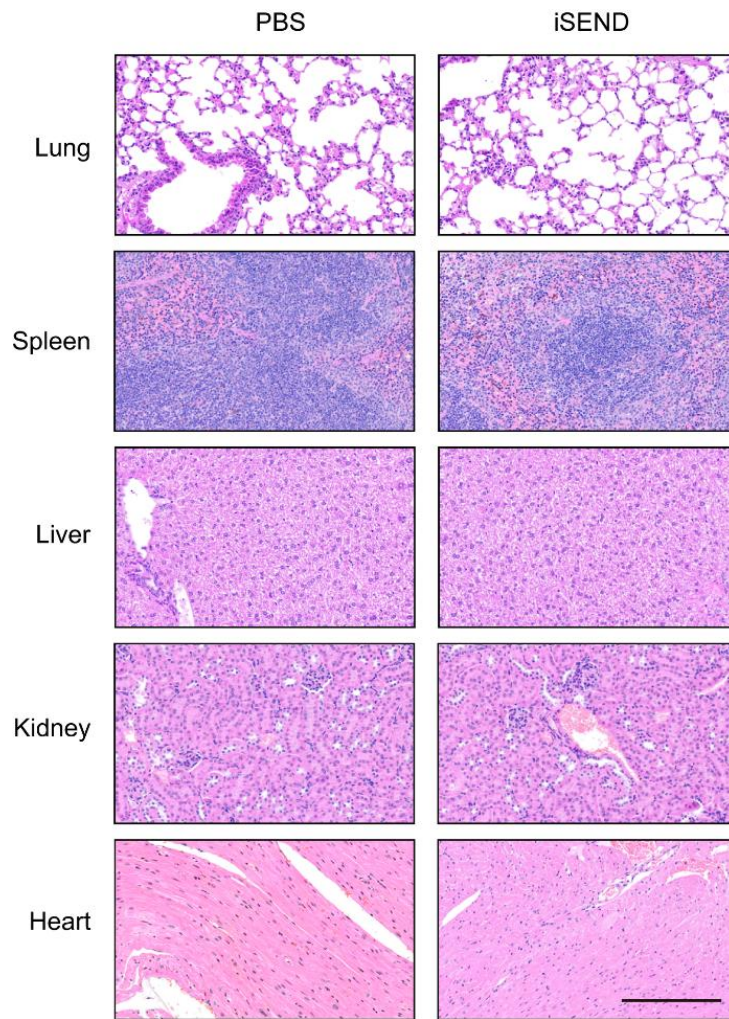

**Supplementary Figure 18.** H&E-stained slice images of major organs. Scale bar, 200  $\mu\text{m}$ .

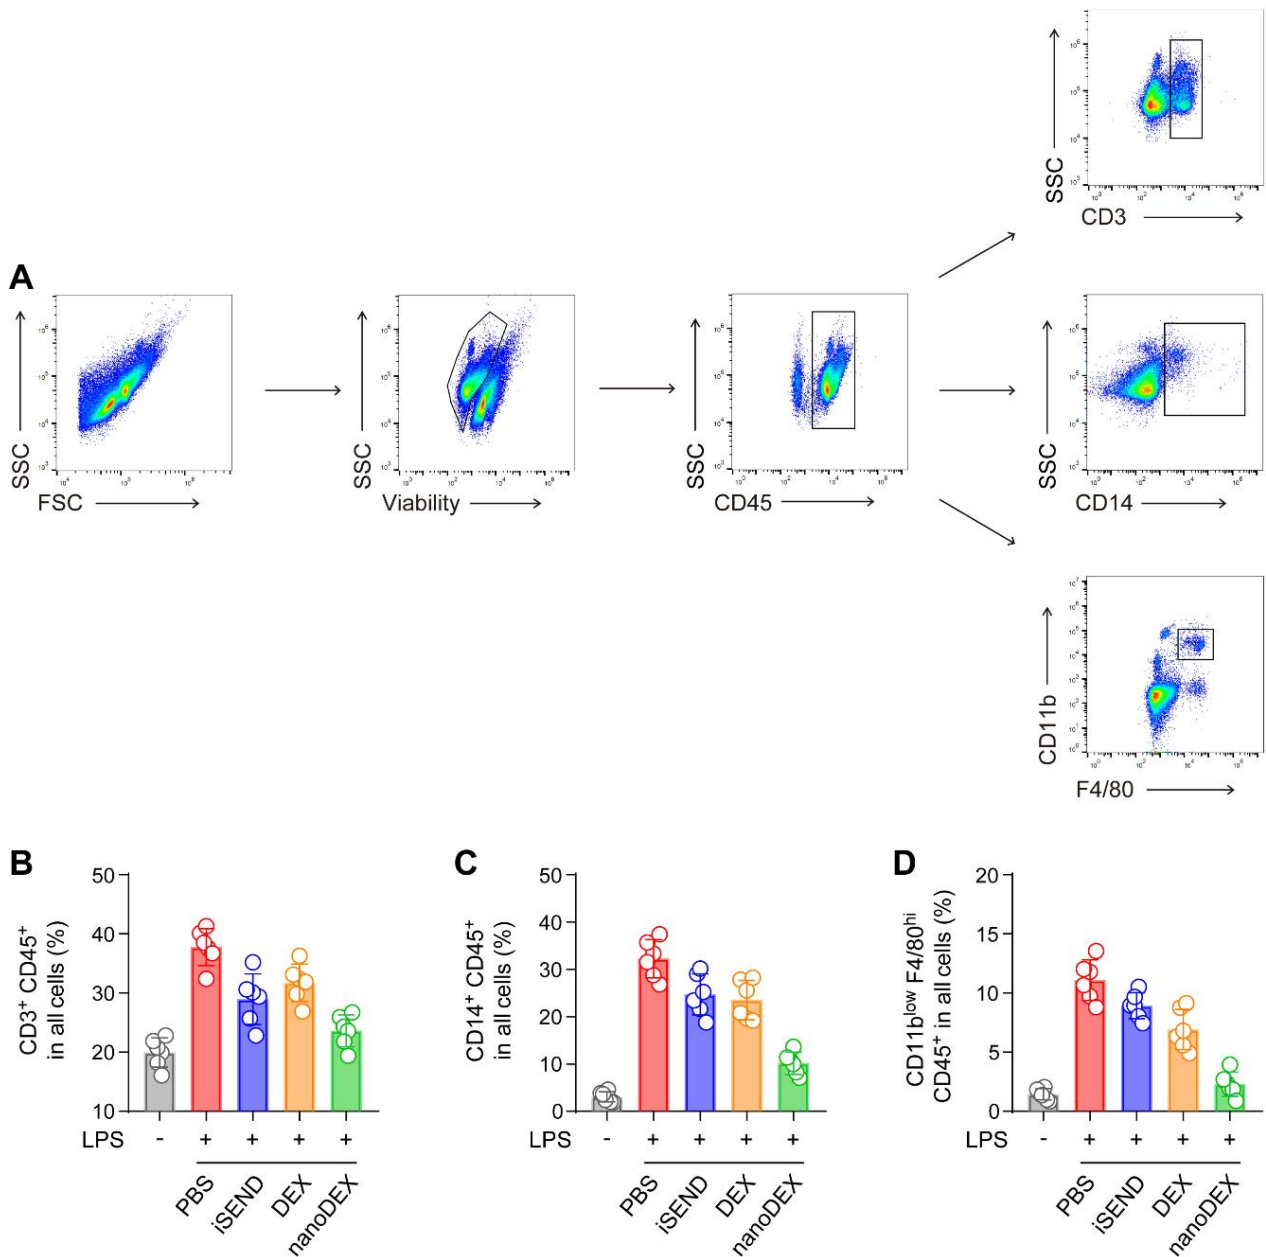

**Supplementary Figure 19.** Flow cytometry analysis of immunocytes in the lung homogenate after indicated treatments. (A) Graphically account for flow cytometry gating strategies. Flow cytometry analysis of (B) CD3<sup>+</sup>CD45<sup>+</sup> T cells, (C) CD14<sup>+</sup>CD45<sup>+</sup> inflammatory infiltrating monocytes/macrophages, and (D) CD11b<sup>low</sup>F4/80<sup>hi</sup> resident macrophages. All data are presented as mean ± S.D. (*n* = 6).

**Supplementary Table 1. Scoring of the inflammation observed in the H&E-stained lung sections in Figure 4C.**

| <b>Group</b>   | Untreated | LPS | LPS + iSEND | LPS + DEX | LPS + nanoDEX |
|----------------|-----------|-----|-------------|-----------|---------------|
| <b>Scoring</b> | 0         | 3   | 2           | 2         | 1             |

The severity of inflammation observed in the H&E-stained lung/trachea sections was scored on a 0–3 scale defined as: 0 = no inflammatory response; 1 = mild inflammation with foci of inflammatory cells in bronchial or vascular wall and in alveolar septa; 2 = moderate inflammation with patchy inflammation or localized inflammation in walls of bronchi or blood vessels and alveolar septa, and less than one-third of the lung cross-sectional area is involved; 3 = severe inflammation with diffuse inflammatory cells in walls of bronchi or blood vessels and alveoli septa, and between one-third and two-thirds of the lung area is involved.

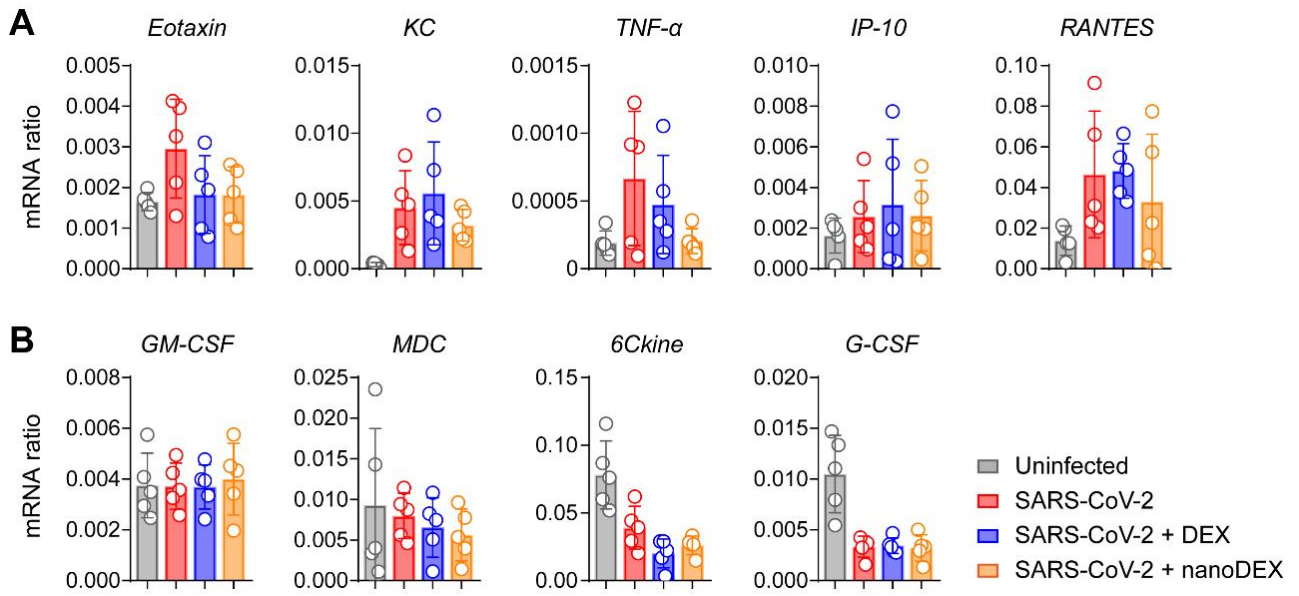

**Supplementary Figure 20.** qRT-PCR analysis of cytokine/chemokine expression in the lung after indicated treatments. (A) *Eotaxin*, *KC*, *TNF- $\alpha$* , *IP-10*, and *RANTES*. (B) *GM-CSF*, *MDC*, *6Ckine* and *G-CSF*. All data are presented as mean  $\pm$  S.D. ( $n = 5$ ).

**Supplementary Table 2. Scoring of the inflammation observed in the H&E-stained lung sections in Figure 5C.**

| <b>Group</b>   | Uninfected | SARS-CoV-2 | SARS-CoV-2 +<br>DEX | SARS-CoV-2 +<br>nanoDEX |
|----------------|------------|------------|---------------------|-------------------------|
| <b>Scoring</b> | 0          | 2          | 1                   | 1                       |

The severity of inflammation observed in the H&E-stained lung/trachea sections was scored on a 0–3 scale defined as: 0 = no inflammatory response; 1 = mild inflammation with foci of inflammatory cells in bronchial or vascular wall and in alveolar septa; 2 = moderate inflammation with patchy inflammation or localized inflammation in walls of bronchi or blood vessels and alveolar septa, and less than one-third of the lung cross-sectional area is involved; 3 = severe inflammation with diffuse inflammatory cells in walls of bronchi or blood vessels and alveoli septa, and between one-third and two-thirds of the lung area is involved.

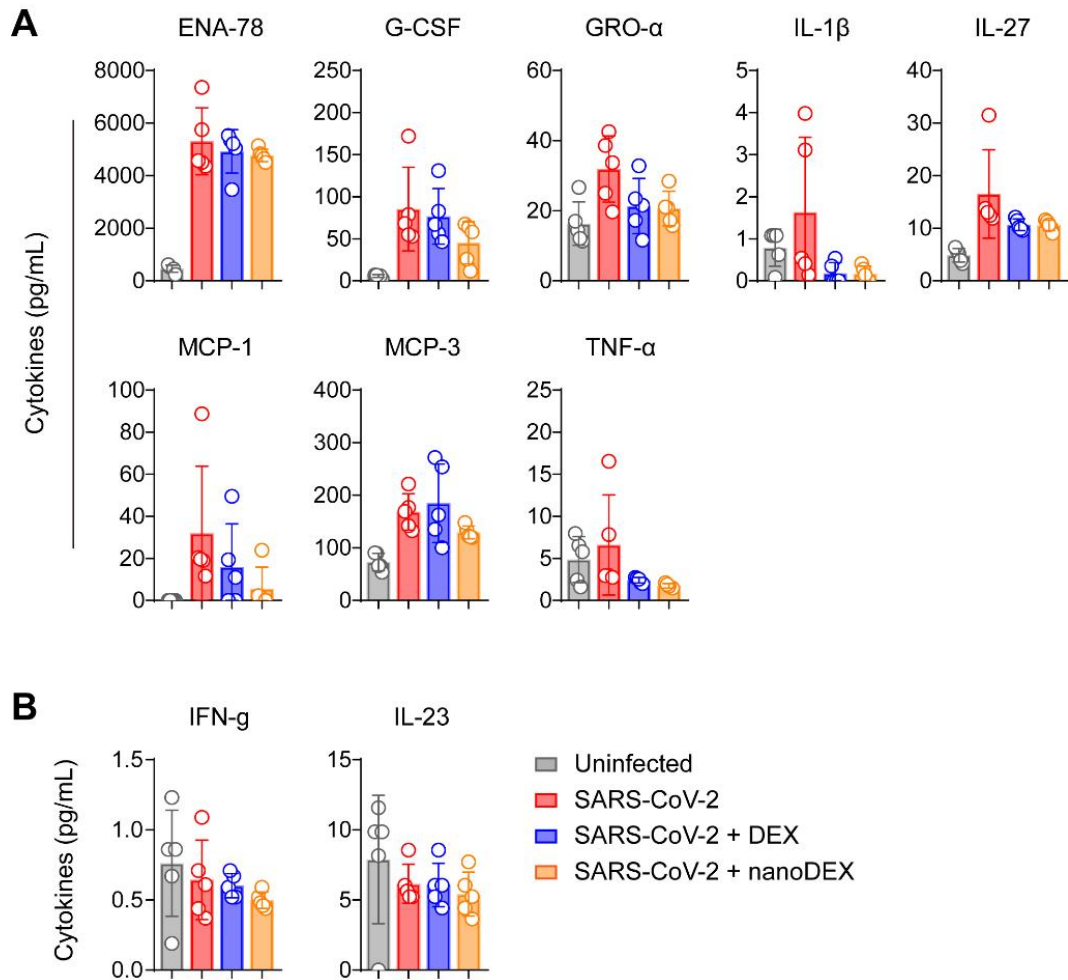

**Supplementary Figure 21.** Luminex analysis of cytokine expression in the serum after indicated treatments. (A) ENA-78, G-CSF, GRO- $\alpha$ , IL-1 $\beta$ , IL-27, MCP-3, MCP-1, and TNF- $\alpha$ . (B) IFN-g and IL-23. All data are presented as mean  $\pm$  S.D. ( $n = 5$ ).



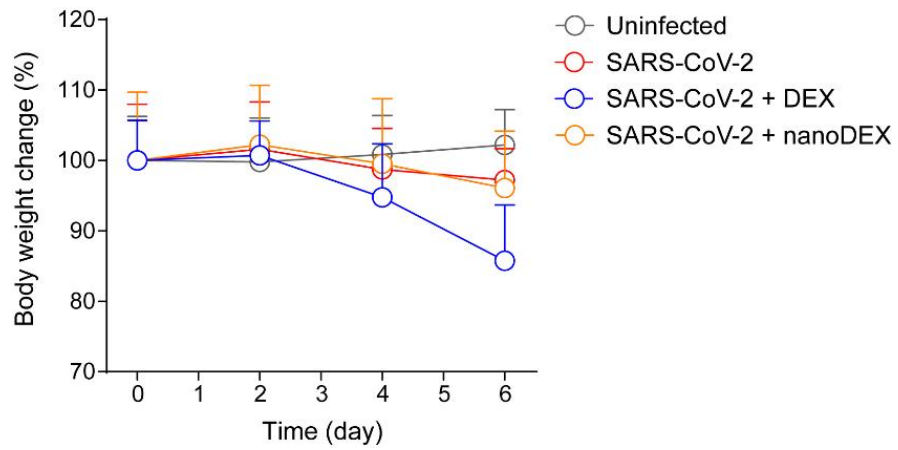

**Supplementary Figure 22.** Body weight change curves of K18-hACE2 transgenic mice challenged with live SARS-CoV-2 following indicated treatments. All data are presented as mean  $\pm$  S.D. ( $n = 5$ ).

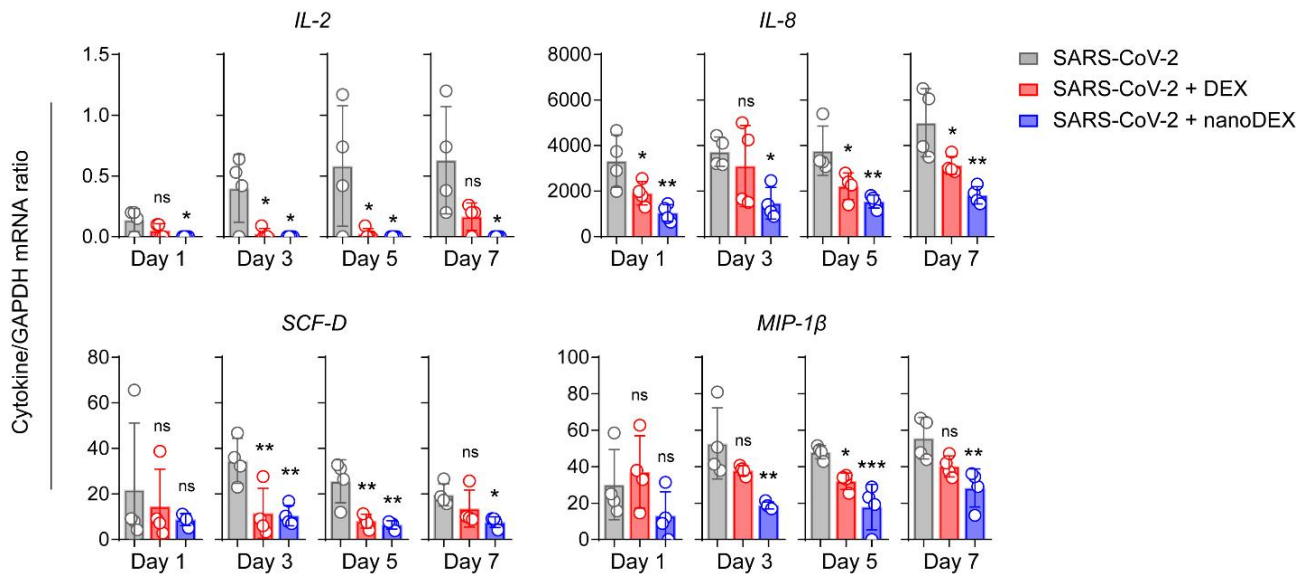

**Supplementary Figure 23.** qRT-PCR analysis of cytokine/chemokine expression in the serum after indicated treatments. All data are presented as mean  $\pm$  S.D. ( $n = 4$ ).

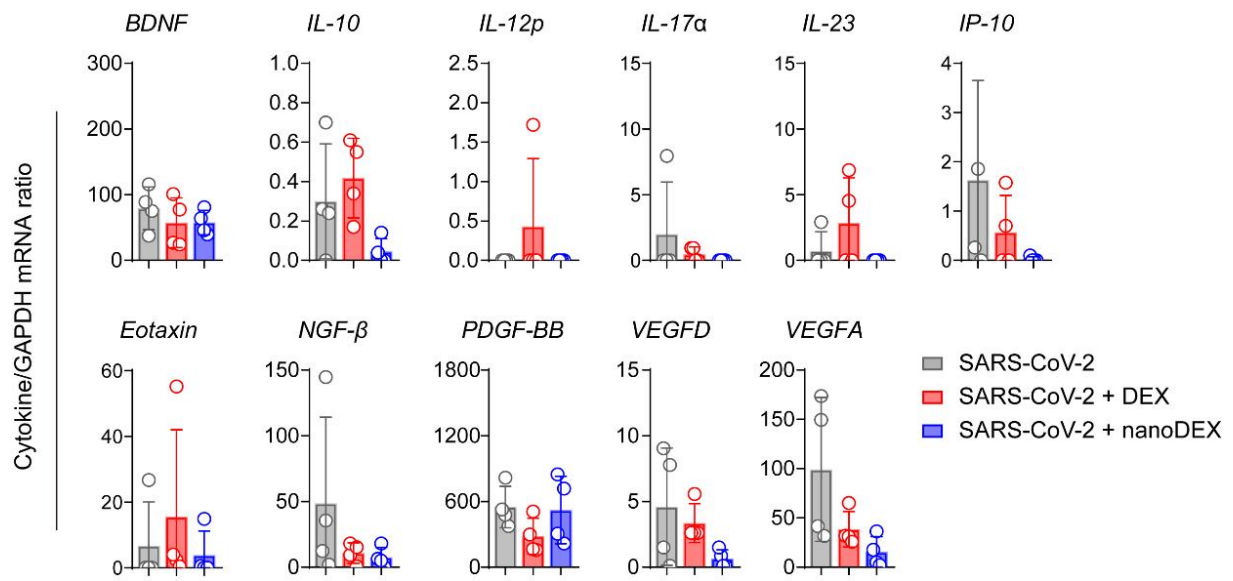

**Supplementary Figure 24.** qRT-PCR analysis of cytokine/chemokine expression in the serum at day 1 after indicated treatments. All data are presented as mean  $\pm$  S.D. ( $n = 4$ ).

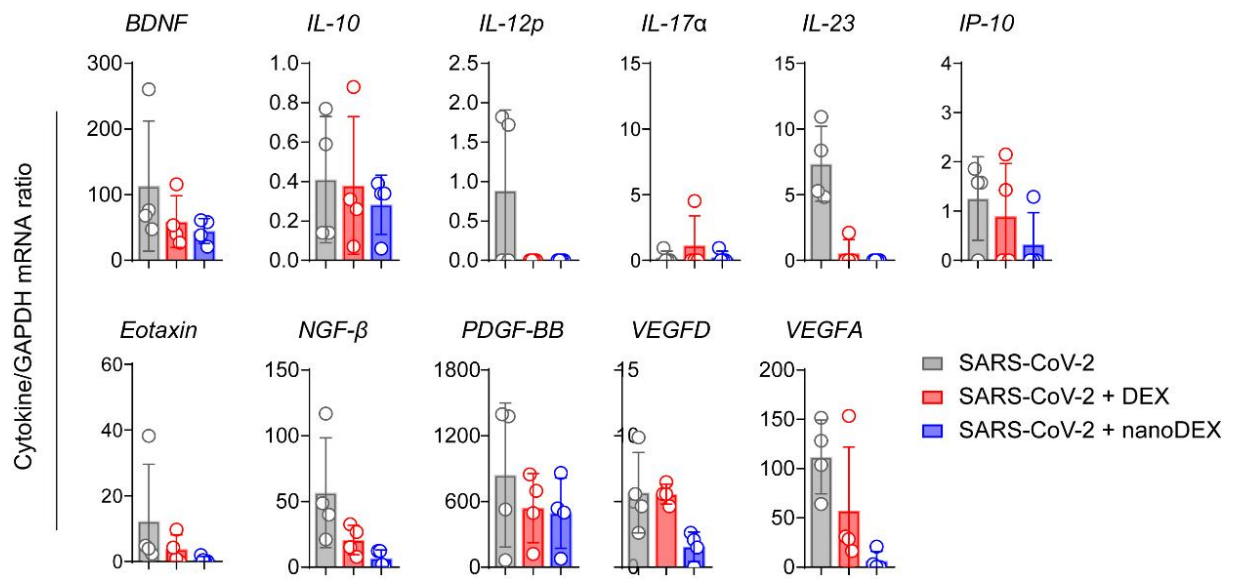

**Supplementary Figure 25.** qRT-PCR analysis of cytokine/chemokine expression in the serum at day 3 after indicated treatments. All data are presented as mean  $\pm$  S.D. ( $n = 4$ ).

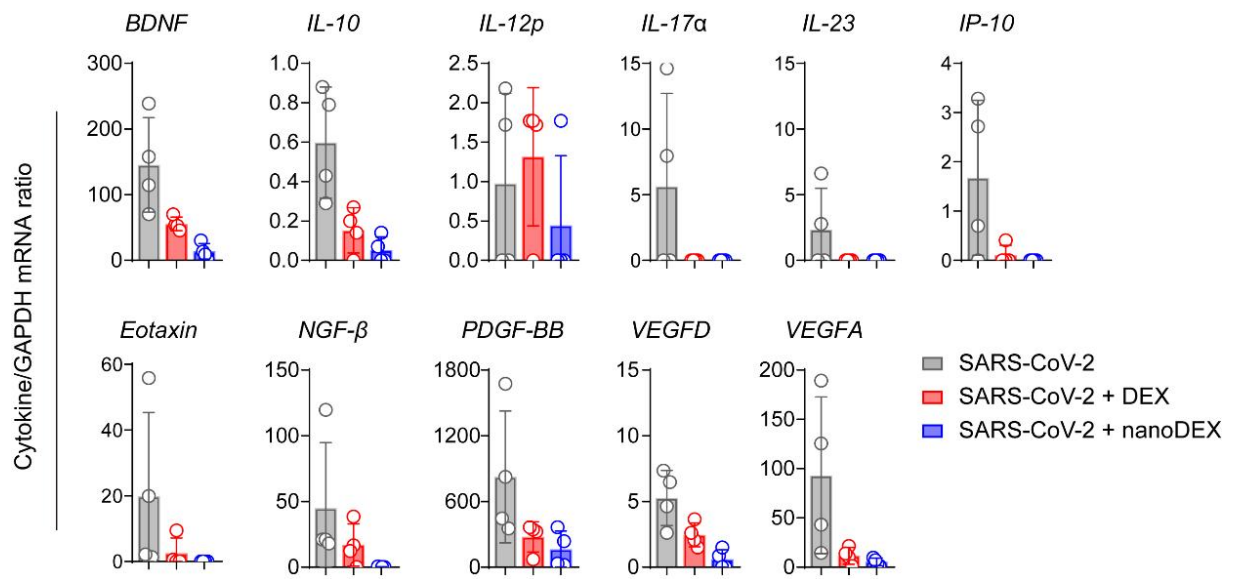

**Supplementary Figure 26.** qRT-PCR analysis of cytokine/chemokine expression in the serum at day 5 after indicated treatments. All data are presented as mean  $\pm$  S.D. ( $n = 4$ ).

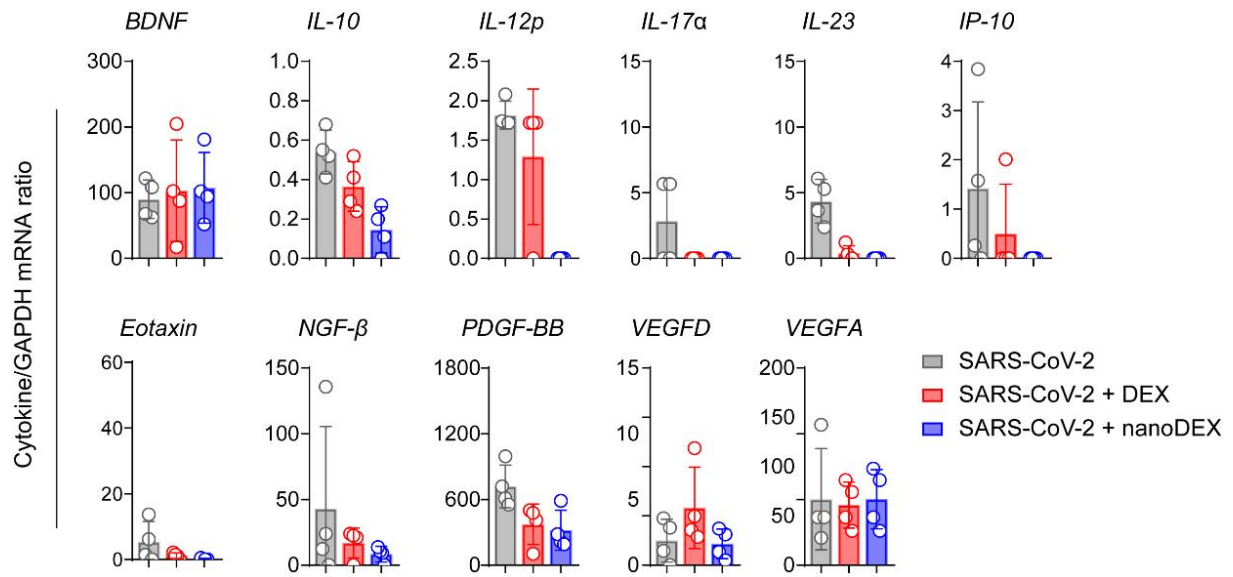

**Supplementary Table 3. Scoring of the inflammation observed in the H&E-stained trachea/lung sections in Figure 6C.**

| <b>Group</b>   |                | SARS-CoV-2 | SARS-CoV-2 +<br>DEX | SARS-CoV-2 +<br>nanoDEX |
|----------------|----------------|------------|---------------------|-------------------------|
| <b>Scoring</b> | <b>Trachea</b> | 3          | 1                   | 1                       |
|                | <b>Lung</b>    | 3          | 1                   | 1                       |

The severity of inflammation observed in the H&E-stained lung/trachea sections was scored on a 0–3 scale defined as: 0 = no inflammatory response; 1 = mild inflammation with foci of inflammatory cells in bronchial or vascular wall and in alveolar septa; 2 = moderate inflammation with patchy inflammation or localized inflammation in walls of bronchi or blood vessels and alveolar septa, and less than one-third of the lung cross-sectional area is involved; 3 = severe inflammation with diffuse inflammatory cells in walls of bronchi or blood vessels and alveoli septa, and between one-third and two-thirds of the lung area is involved.

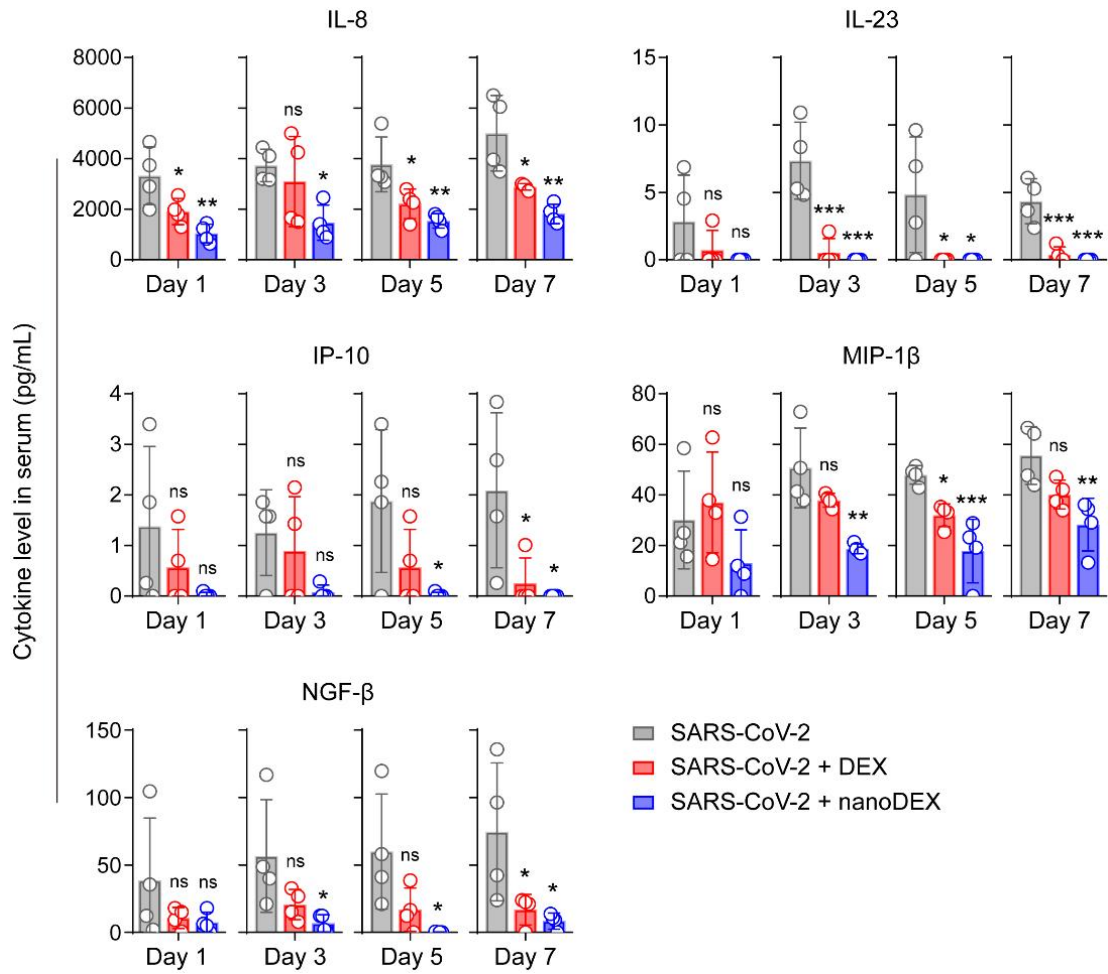

**Supplementary Figure 28.** Multiplex immunoassay analysis of cytokine/chemokine expression in the serum after indicated treatments. All data are presented as mean  $\pm$  S.D. ( $n = 4$ ).



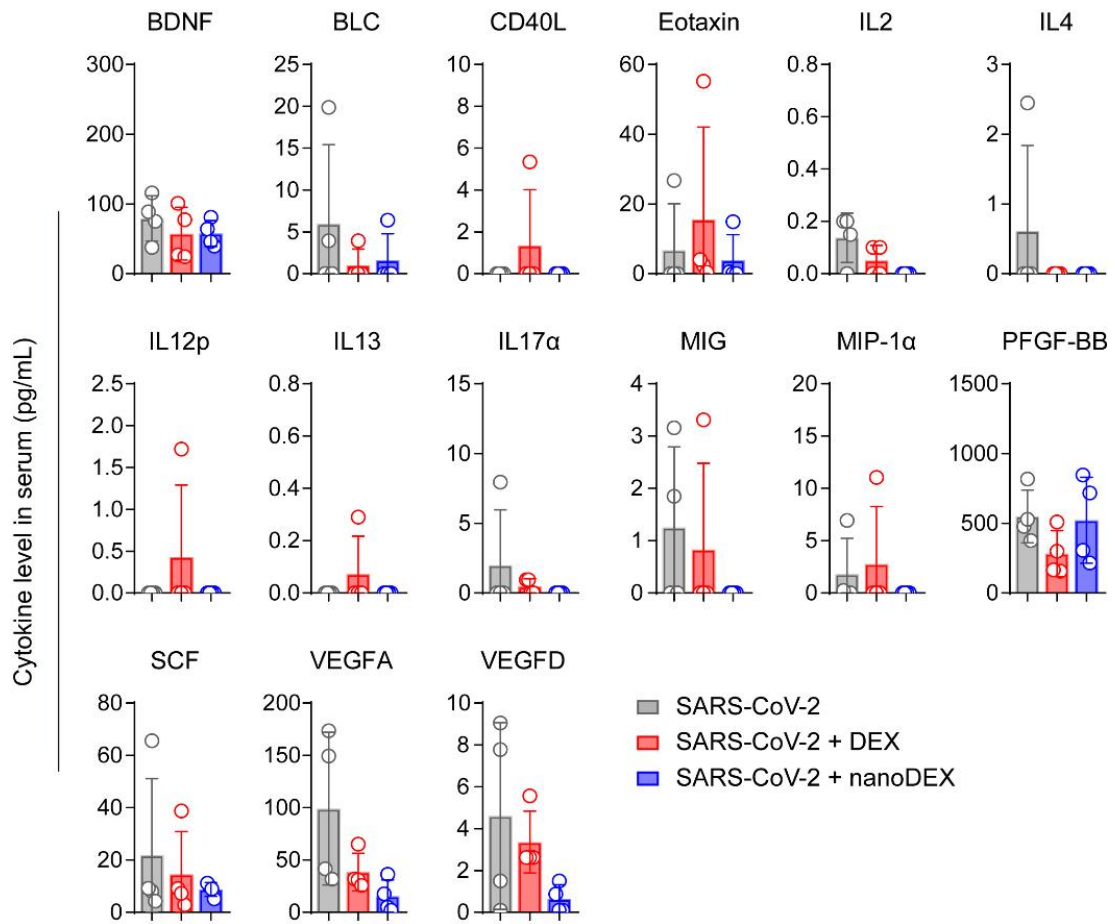

**Supplementary Figure 29.** Multiplex immunoassay analysis of cytokine/chemokine expression in the serum at day 1 after indicated treatments. All data are presented as mean  $\pm$  S.D. ( $n = 4$ ).

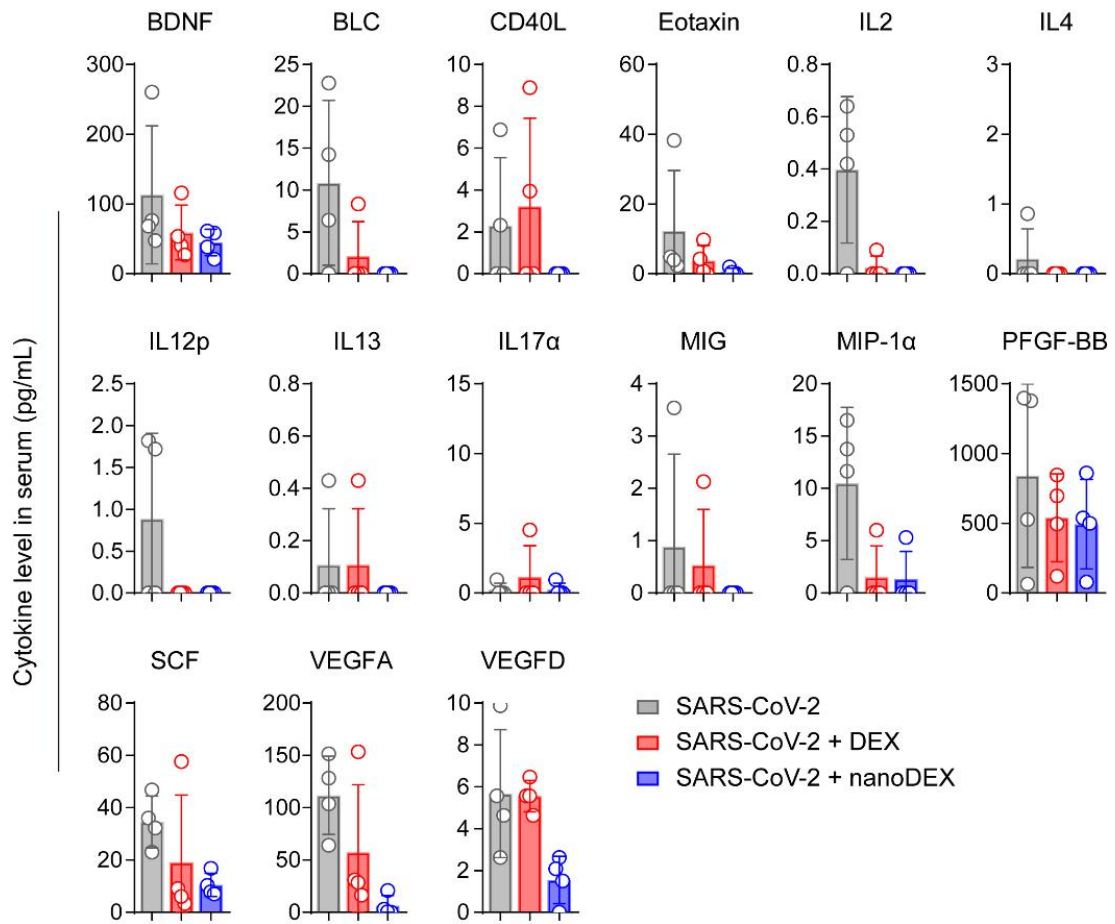

**Supplementary Figure 30.** Multiplex immunoassay analysis of cytokine/chemokine expression in the serum at day 3 after indicated treatments. All data are presented as mean  $\pm$  S.D. ( $n = 4$ ).

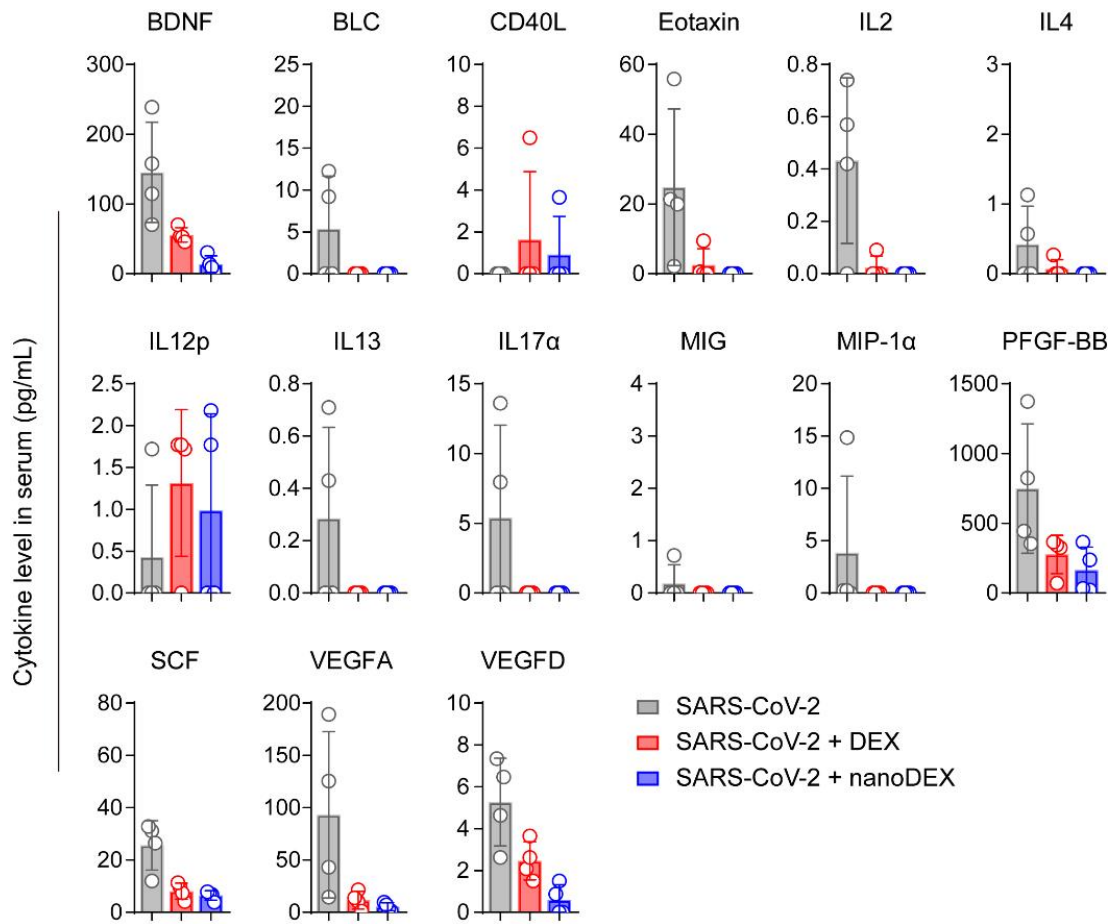

**Supplementary Figure 31.** Multiplex immunoassay analysis of cytokine/chemokine expression in the serum at day 5 after indicated treatments. All data are presented as mean  $\pm$  S.D. ( $n = 4$ ).

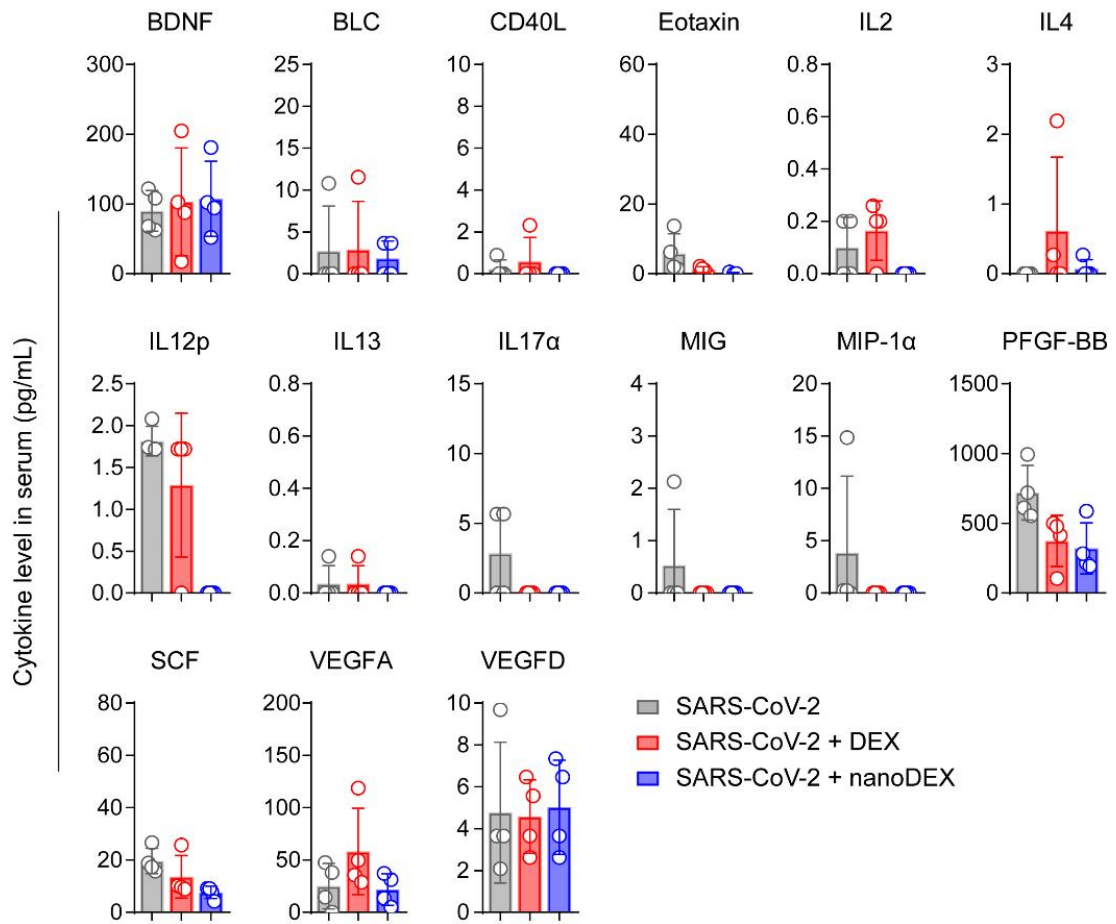

**Supplementary Figure 32.** Multiplex immunoassay analysis of cytokine/chemokine expression in the serum at day 7 after indicated treatments. All data are presented as mean  $\pm$  S.D. ( $n = 4$ ).

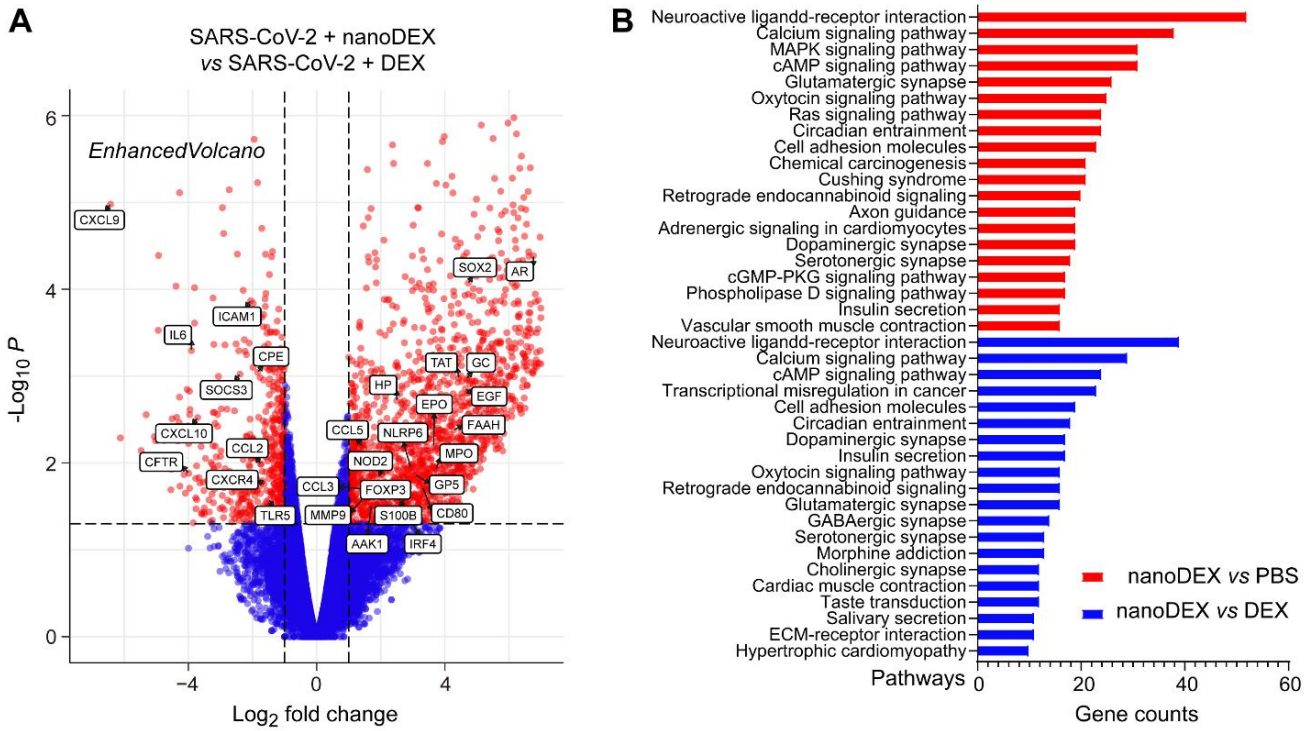

**Supplementary Figure 33.** Transcriptome analysis of the lung tissues of rhesus macaques after indicated treatments. (A) Volcano of differentially expressed genes by comparing the nanoDEX group to the DEX group. The genes associated with inflammation were marked by black boxes. (B) KEGG pathways in different groups.

**Supplementary Table 4. The primers for qRT-PCR analysis of samples from mice.**

|                      |                         |
|----------------------|-------------------------|
| mIL-1 alpha-F        | CGAAGACTACAGTTCTGCCATT  |
| mIL-1 alpha-R        | GACGTTTCAGAGGTTCTCAGAG  |
| mIL-1 beta-F         | GCAACTGTTCTGAACTCAACT   |
| mIL-1 beta-R         | ATCTTTTGGGGTCCGTCAACT   |
| mIL-2-F              | TGAGCAGGATGGAGAATTACAGG |
| mIL-2-R              | GTCCAAGTTCATCTTCTAGGCAC |
| mIL-4-F              | GGTCTCAACCCCAGCTAGT     |
| mIL-4-R              | GCCGATGATCTCTCTCAAGTGAT |
| mIL-6-F              | TAGTCCTTCCTACCCCAATTTCC |
| mIL-6-R              | TTGGTCCTTAGCCACTCCTTC   |
| mIL-10-F             | GCTCTTACTGACTGGCATGAG   |
| mIL-10-R             | CGCAGCTCTAGGAGCATGTG    |
| mTNF-alpha-F         | CCCTCACACTCAGATCATCTTCT |
| mTNF-alpha-R         | GCTACGACGTGGGCTACAG     |
| mIL-12a-F            | CAATCACGCTACCTCCTCTTTT  |
| mIL-12a-R            | CAGCAGTGCAGGAATAATGTTTC |
| mG-CSF-F             | ATGGCTCAACTTTCTGCCAG    |
| mG-CSF-R             | CTGACAGTGACCAGGGGAAC    |
| mGM-CSF-F            | GGCCTTGGAAGCATGTAGAGG   |
| mGM-CSF-R            | GGAGAACTCGTTAGAGACGACTT |
| mRANTES(Ccl5)-F      | GCTGCTTTGCCTACCTCTCC    |
| mRANTES(Ccl5)-R      | TCGAGTGACAAACACGACTGC   |
| mMCP-1(Ccl2)-F       | TTAAAAACCTGGATCGGAACCAA |
| mMCP-1(Ccl2)-R       | GCATTAGCTTCAGATTTACGGGT |
| mMIP-1 alpha(Ccl3)-F | TTCTCTGTACCATGACACTCTGC |
| mMIP-1 alpha(Ccl3)-R | CGTGGAATCTTCCGGCTGTAG   |
| mSDF-1(Cxcl12)-F     | TGCATCAGTGACGGTAAACCA   |
| mSDF-1(Cxcl12)-R     | TTCTTCAGCCGTGCAACAATC   |

|                    |                          |
|--------------------|--------------------------|
| mIP-10(Cxcl10)-F   | CCAAGTGCTGCCGTCATTTTC    |
| mIP-10(Cxcl10)-R   | GGCTCGCAGGGATGATTTCAA    |
| mEotaxin(Cxcl11)-F | GAATCACCAACAACAGATGCAC   |
| mEotaxin(Cxcl11)-R | ATCCTGGACCCACTTCTTCTT    |
| mMDC(Ccl22)-F      | AGGTCCTATGGTGCCAATGT     |
| mMDC(Ccl22)-R      | CGGCAGGATTTTGAGGTCCA     |
| mKC(Ccl1)-F        | CTGGGATTCACCTCAAGAACATC  |
| mKC(Ccl1)-R        | CAGGGTCAAGGCAAGCCTC      |
| m6Ckine(Ccl21a)-F  | GTGATGGAGGGGGTCAGGA      |
| m6Ckine(Ccl21a)-R  | GGGATGGGACAGCCTAAACT     |
| mMIG(Ccl9)-F       | GGAGTTCGAGGAACCCTAGTG    |
| mMIG(Ccl9)-R       | GGGATTTGTAGTGGATCGTGC    |
| mGAPDH-F           | TCAACAGCAACTCCCCTCTTCCA  |
| mGAPDH-R           | ACCCTGTTGCTGTAGCCGTATTCA |

**Supplementary Table 5. The primers for qRT-PCR analysis of samples from macaques.**

|                         |                           |
|-------------------------|---------------------------|
| monkey-IL1 $\alpha$ -F  | TTTGAAGACCTGAAGAACTGTTAC  |
| monkey-IL1 $\alpha$ -R  | CAACCGTCTCTTCTTCAGAACCT   |
| monkey-IL1B-F           | TTGGAGCAACAAGTGGTGTCT     |
| monkey-IL1B-R           | GAGAGGTGCTGATGTACCAGTT    |
| monkey-IL2-F            | GATTTACAGATGATTTTGAATGG   |
| monkey-IL2-R            | TGTGGCAATCCAATACAGGG      |
| monkey-IL4-F            | TGAACAGCCTCACAGAGCAG      |
| monkey-IL4-R            | AGCGAGTGTCTTCTCATGG       |
| monkey-IL6-F            | CCAGCCACTGACCTCTTCAG      |
| monkey-IL6-R            | ACCAGGCAAGTGTCTCATT       |
| monkey-IL10-F           | GATGCCTTCAGCAGAGTGAAG     |
| monkey-IL10-R           | GTCTGGGTCGTGGTTCTCAG      |
| monkey-IL7-F            | AGGTATATCTTTGGACTTCCTCC   |
| monkey-IL7-R            | AATTTCTTTCATGCTGTCCAATAAT |
| monkey-IL12 $\beta$ -F  | ACTGATGTTTTAAAGGACCAG     |
| monkey-IL12 $\beta$ -R  | CTCTGCAGAGAGTGTAACGG      |
| monkey-IL17-F           | ACTCCTGGGAAGACCTCATTG     |
| monkey-IL17-R           | CTCTCAGGGTCCTCATTGCG      |
| monkey-IFN- $\gamma$ -F | GAAGCAGAAAACCTTAAGAAATAT  |
| monkey-IFN- $\gamma$ -R | CTCTGGTCATCTTTGAAGTTTT    |
| monkey-TNF- $\alpha$ -F | AGAAGGCCTGTACCTCATCT      |
| monkey-TNF- $\alpha$ -R | AGGGCAATGATCCCAAAGTAG     |
| monkey-CSF3-F           | GCCGCGCTGCAGGAGAAG        |
| monkey-CSF3-R           | GGAAGAGGCTGCTATGGAGT      |
| monkey-GM-CSF-F         | CCTGAGTAGAGACACTGCTG      |
| monkey-GM-CSF-R         | GTGCTGCTTGTAGTGGCTGG      |
| monkey-RANTES-F         | CTCTGCGCTCCTGCATCTG       |
| monkey-RANTES-R         | TCTCTGGGTTGGCACACA        |



|                          |                        |
|--------------------------|------------------------|
| monkey-MCP1-F            | CAGGGGCTCGCTCAGCC      |
| monkey-MCP1-R            | CACTTCTGCTTGGGGTCAGC   |
| monkey-MIP-1 $\alpha$ -F | CTCTGCAACCGGATCTCAGC   |
| monkey-MIP-1 $\beta$ -R  | GACCTGCCGGCCTCTCTTG    |
| monkey-MIP-1 $\beta$ -F  | GCTCTCCAGCACTCTCAGC    |
| monkey-MIP1B-R           | CTCACTGGGGTCAGCGCAG    |
| monkey-SDF1-F            | CCGTCAGCCTGAGCTACAG    |
| monkey-SDF1-R            | GCTTTCTCCAGGTA CTCTG   |
| monkey-IP10-F            | TTTCTGACTCTAAGTGGTATTC |
| monkey-IP10-R            | TTCTGGATTCAGACACCTCTT  |
| monkey-MIG-F             | TCTTCTGGTTCTGATTGGAG   |
| monkey-MIG-R             | CATGTTTGATCTCCATTCTTCA |
| monkey-EOTAXIN-F         | CTCACTGGGCCAGATTCTGTTG |
| monkey-EOTAXIN-R         | ATGGAATCCTGCACCCACTTC  |
| monkey-TARC-F            | GCTTCTCTGCAGCACATCCATG |
| monkey-TARC-R            | CCGAACAGATGGCCTTGTTT   |
| monkey-KC-F              | CAGGCAGCCTCCATGCAGC    |
| monkey-KC-R              | CTTAGATCTGGGGCTGTCC    |
| monkey-6Ckine-F          | CTTTGGCATCCCCGGGAC     |
| monkey-6Ckine-R          | GGTCTGCACATAGCTCTGCC   |
| monkey-MDC-F             | TGGCGCTTCAAGCAACTGAG   |
| monkey-MDC-R             | CACTCTGGGATCGGCACAGA   |
| monkey-GAPDHF            | AGCCCCATCACCATCTTCC    |
| monkey-GAPDHR            | AATGAGCCCCAGCCTTCTC    |
